# Supplementary material
Source: PubMed Central journal article supplement (PMC8443366)
Supplement: mmc1.pdf [file mmc1.pdf]

**Supplemental information**

**Potent neutralization of SARS-CoV-2 variants  
of concern by an antibody with an uncommon genetic  
signature and structural mode of spike recognition**

**Kevin J. Kramer, Nicole V. Johnson, Andrea R. Shiakolas, Naveenchandra Suryadevara, Sivakumar Periasamy, Nagarajan Raju, Jazmean K. Williams, Daniel Wrapp, Seth J. Zost, Lauren M. Walker, Steven C. Wall, Clinton M. Holt, Ching-Lin Hsieh, Rachel E. Sutton, Ariana Paulo, Rachel S. Nargi, Edgar Davidson, Benjamin J. Doranz, James E. Crowe Jr., Alexander Bukreyev, Robert H. Carnahan, Jason S. McLellan, and Ivelin S. Georgiev**

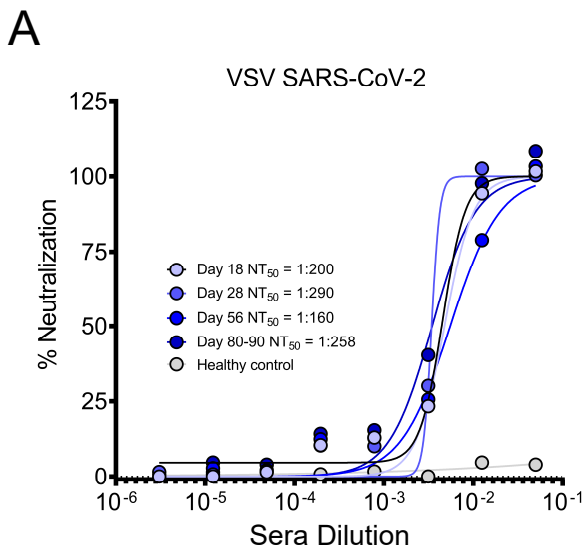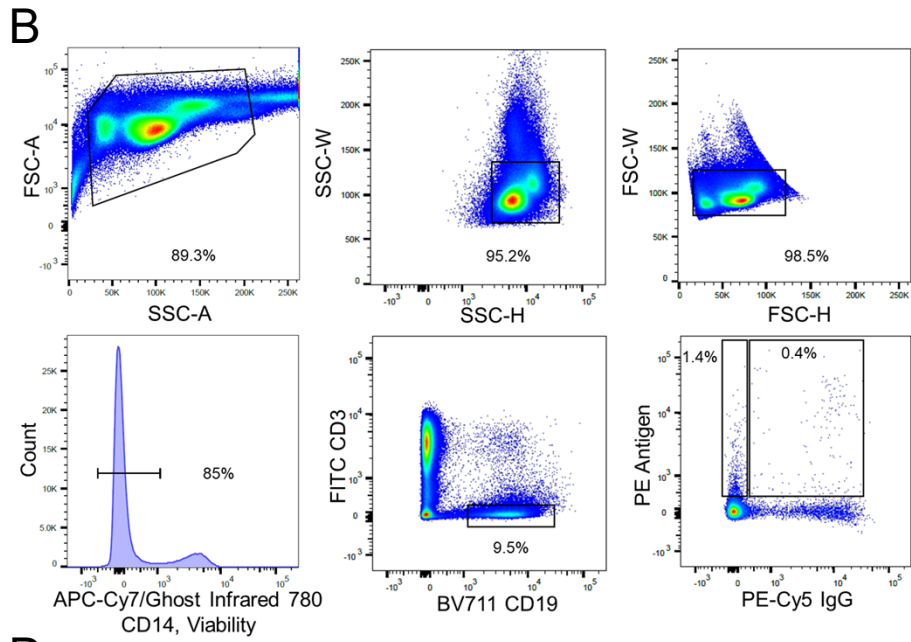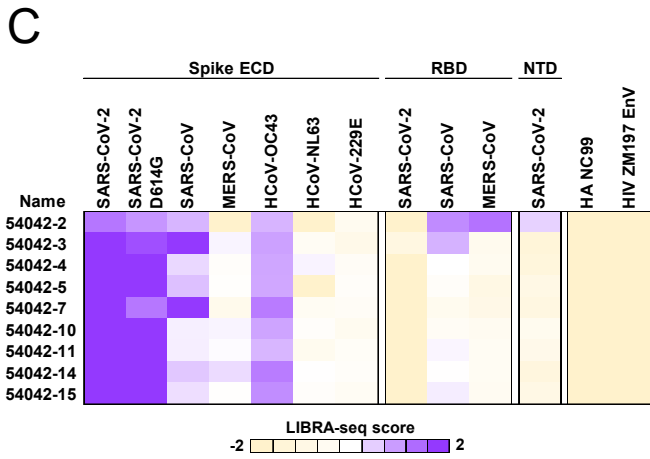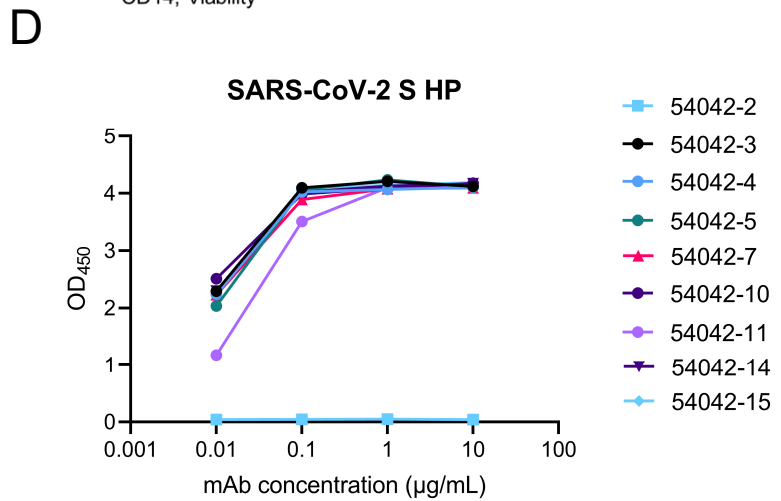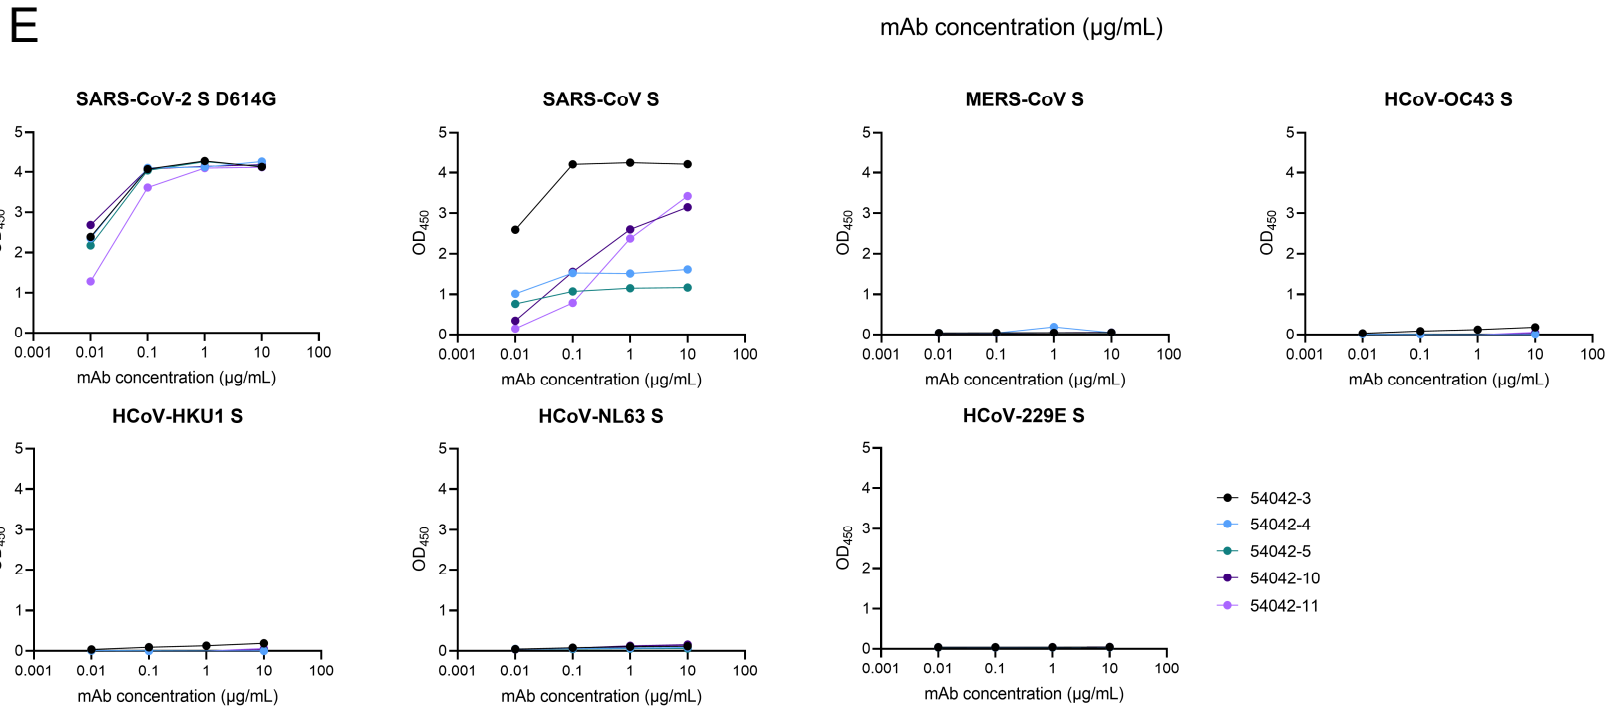

**Supplemental Figure 1: Identification and characterization of SARS-CoV-2 neutralizing antibodies isolated using LIBRA-seq, related to Figure 1.**

- (A) VSV SARS-CoV-2 neutralization capacity of serum is displayed from time points at day 18, day 28, day 56, and days 80-90 post-COVID-19 infection. Neutralization was performed in single technical conditions with 1 biological replicate.
- (B) Gating scheme for fluorescent-activated cell sorting of recovered COVID-19 individual. Cells were stained with Ghost Red 780 (viability), CD14-APC-Cy7, CD3-FITC, CD19-BV711, and IgG-PE-Cy5 along with a DNA-barcoded antigen screening library. To detect antigen-positive B cells, cells were washed and treated with a streptavidin-PE secondary stain. Gates as drawn are based on gates used during the sort, and percentages from the sort are listed.
- (C) LIBRA-seq scores for SARS-CoV-2 S, SARS-CoV-2 S D614G, SARS-CoV S, MERS-CoV S, HCoV-OC43 S, HCoV-229E S, HCoV-NL63 S, SARS-CoV-2 RBD, SARS-CoV RBD, and MERS-CoV RBD, as well as negative-control antigens ZM197 Env and hemagglutinin (HA) NC99 are shown. LIBRA-seq scores for each antigen are displayed as a heatmap with a LIBRA-seq score of -2 displayed as light yellow, 0 as white, and 2 in purple; in this heatmap, scores lower or higher than that range are shown as -2 and 2, respectively.
- (D) ELISA binding data of candidate antibodies identified by LIBRA-seq against SARS-CoV-2 S HP. The optical density at 450 nm (y-axis) is depicted as a function of antibody concentration (x-axis). ELISAs were performed in single technical conditions with 1 biological replicate.
- (E) ELISA binding data of the antibodies that displayed neutralization in the high-throughput VSV SARS-CoV-2 RTCA (**Figure 1B**) for the antigens SARS-CoV-2 S D614G, SARS-CoV S, MERS-CoV S, HCoV-OC43 S, HCoV-HKU1 S, HCoV-NL63 S, and HCoV-229E S. The optical density at 450 nm (y-axis) is depicted as a function of antibody concentration (x-axis). ELISAs were performed in single technical conditions with 1 biological replicate.

# Supplemental Figure 2

## SARS-CoV-2 S1

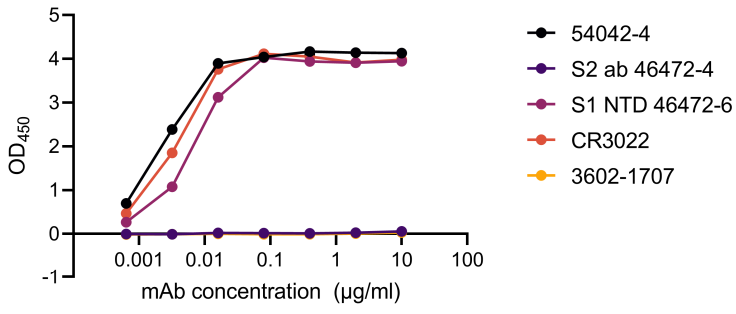

## SARS-CoV-2 S2

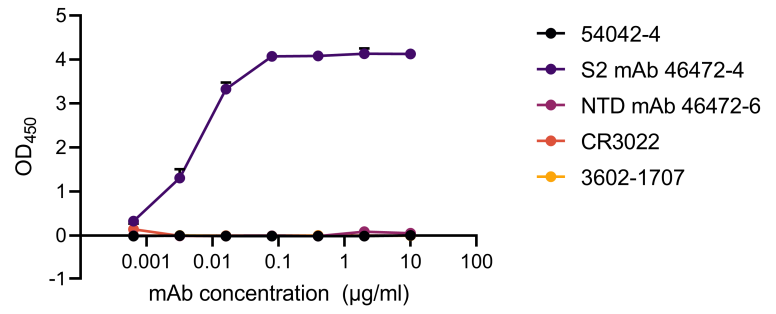

## SARS-CoV-2 RBD

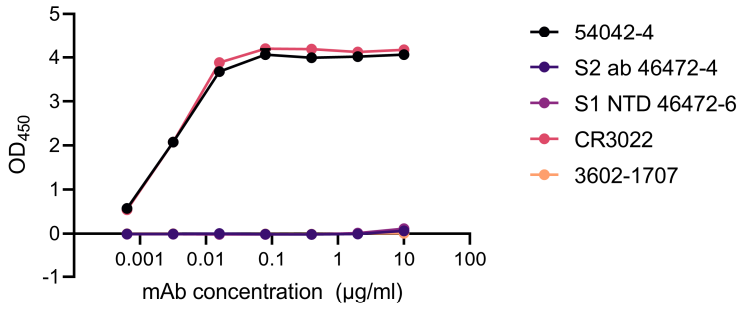

## SARS-CoV-2 NTD

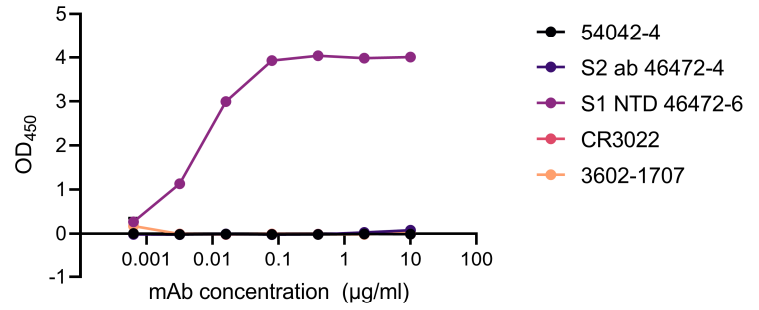

**Supplemental Figure 2: Epitope mapping of antibody 54042-4 to SARS-CoV-2 subunit domains, related to Figure 2.**

ELISA binding data against SARS-CoV-2 subdomains RBD, NTD, S1, and S2 are shown. CR3022 was used as a positive control RBD-directed antibody (Yuan et al., 2020a) whereas 46472-4 and 46472-6 antibodies were used as positive controls for the S2 and NTD, respectively (Shiakolas et al., 2021). The HA-specific 3602-1707 antibody (Setliff et al., 2019.) was used as a negative control. ELISAs were performed with 2 technical duplicates and with 2 biological duplicates; data is represented as mean +/- SEM.

A

**54042-4 epitope on SARS-CoV-2 S**

| <b>S residue #</b> | <b>AA</b> | <b>Buried surface area</b> |
|--------------------|-----------|----------------------------|
| 346                | Arg       | 23                         |
| 439                | Asn       | 6                          |
| 440                | Asn       | 26                         |
| 441                | Leu       | 28                         |
| 443                | Ser       | 21                         |
| 444                | Lys       | 108                        |
| 445                | Val       | 145                        |
| 446                | Gly       | 61                         |
| 447                | Gly       | 10                         |
| 448                | Asn       | 1                          |
| 449                | Tyr       | 33                         |
| 450                | Asn       | 48                         |
| 498                | Gln       | 34                         |
| 499                | Pro       | 35                         |
| 500                | Thr       | 82                         |

B

**54042-4 paratope on SARS-CoV-2 S**

|                    | <b>Ab residue #</b> | <b>AA</b> | <b>Buried surface area</b> |    |
|--------------------|---------------------|-----------|----------------------------|----|
|                    | 32                  | Ile       | 12                         |    |
|                    | 52                  | Tyr       | 34                         |    |
|                    | 53                  | Trp       | 42                         |    |
|                    | 54                  | Asp       | 47                         |    |
| <b>Heavy chain</b> | 56                  | Asp       | 42                         |    |
|                    | 58                  | Arg       | 61                         |    |
|                    | 97                  | Phe       | 28                         |    |
|                    | 98                  | Ser       | 11                         |    |
|                    | 99                  | Ser       | 99                         |    |
|                    | 100A                | Asp       | 2                          |    |
|                    | 100B                | Trp       | 2                          |    |
|                    | 100C                | Gly       | 2                          |    |
|                    |                     | 30        | Phe                        | 35 |
|                    |                     | 32        | Tyr                        | 55 |
| <b>Light chain</b> | 91                  | Ser       | 10                         |    |
|                    | 92                  | His       | 73                         |    |
|                    | 93                  | Ser       | 2                          |    |
|                    | 94                  | Thr       | 20                         |    |
|                    | 96                  | Phe       | 6                          |    |

**Supplemental Figure 3: Epitope and paratope contributions to the interaction of 54042-4 to the SARS-CoV-2 RBD, related to Figure 4.**

- (A) SARS-CoV-2 spike residues comprising the epitope of 54042-4 are shown with their associated buried surface area ( $\text{\AA}^2$ ).
- (B) 54042-4 residues comprising the antibody paratope against SARS-CoV-2 spike are shown with their associated buried surface area values ( $\text{\AA}^2$ ).

A

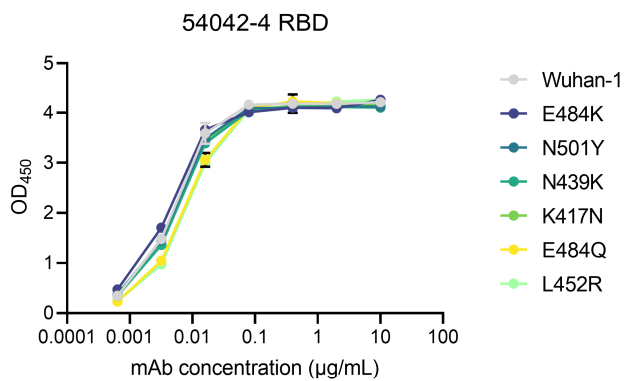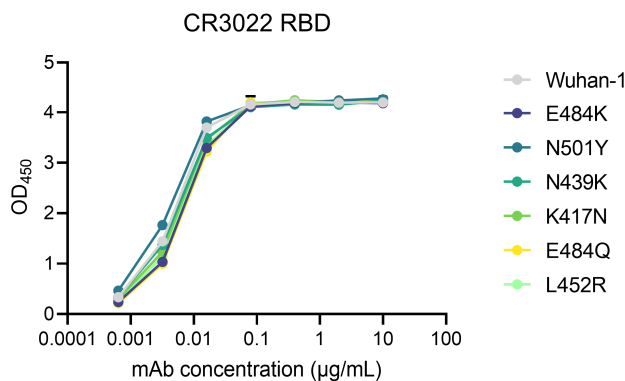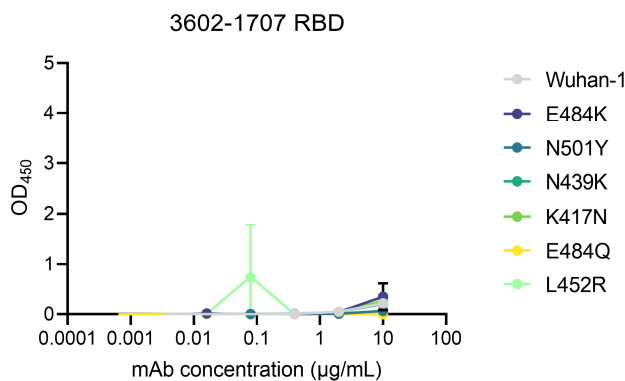

B

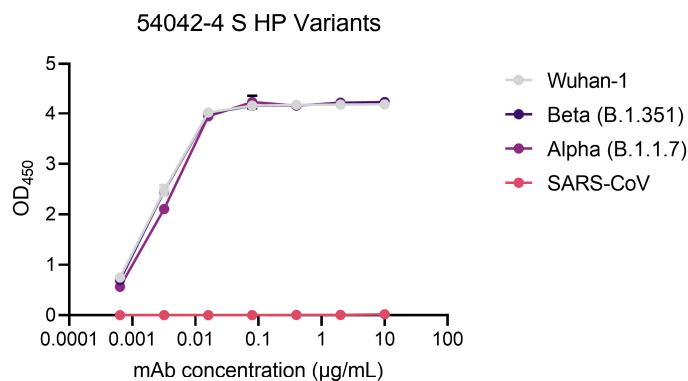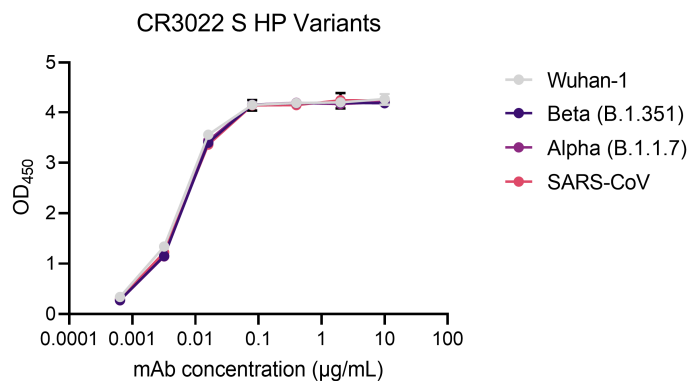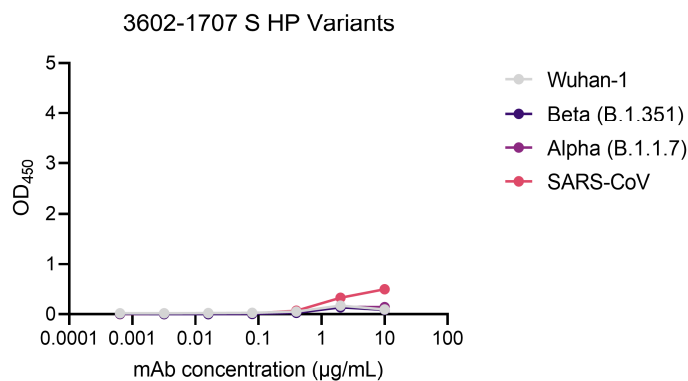

C

**Mutations in S Variant Constructs**

| <b>Alpha<br/>(B.1.1.7)</b> | <b>Beta<br/>(B.1.351)</b> |
|----------------------------|---------------------------|
| Δ69-70                     | L18F                      |
| Δ144                       | D80A                      |
| N501Y                      | ΔL242-244L                |
| A570D                      | R246I                     |
| P681H                      | K417N                     |
|                            | E484K                     |
|                            | N501Y                     |



**Supplemental Figure 4: Epitope mapping and characterization of 54042-4 binding to RBD and S1 substitutions in Alpha and Beta VOC recombinant S constructs, related to Figure 5.**

- (A) ELISA binding data against SARS-CoV-2 Wuhan-1 RBD and RBDs with substitutions E484K, N501Y, N439K, K417N, E484Q, or L452R. CR3022 was used as a positive control and 3602-1707, an HA-specific antibody, was used as a negative control. ELISAs were performed with 2 technical duplicates and with 2 biological duplicates; data is represented as mean +/- SD.
- (B) ELISA binding data against SARS-CoV-2 S HP, SARS-CoV S, and SARS-CoV-2 S HP constructs with substitutions in the S1 domain for the Beta and Alpha variants of concern. CR3022 was used as a positive control and 3602-1707 was used as a negative control antibody. ELISAs were performed with 2 technical duplicates and with 2 biological duplicates; data is represented as mean +/- SD.
- (C) The substitutions and deletions present in the Alpha and Beta SARS-CoV-2 S constructs used in the ELISAs depicted in **Supplemental Figure 4B**.

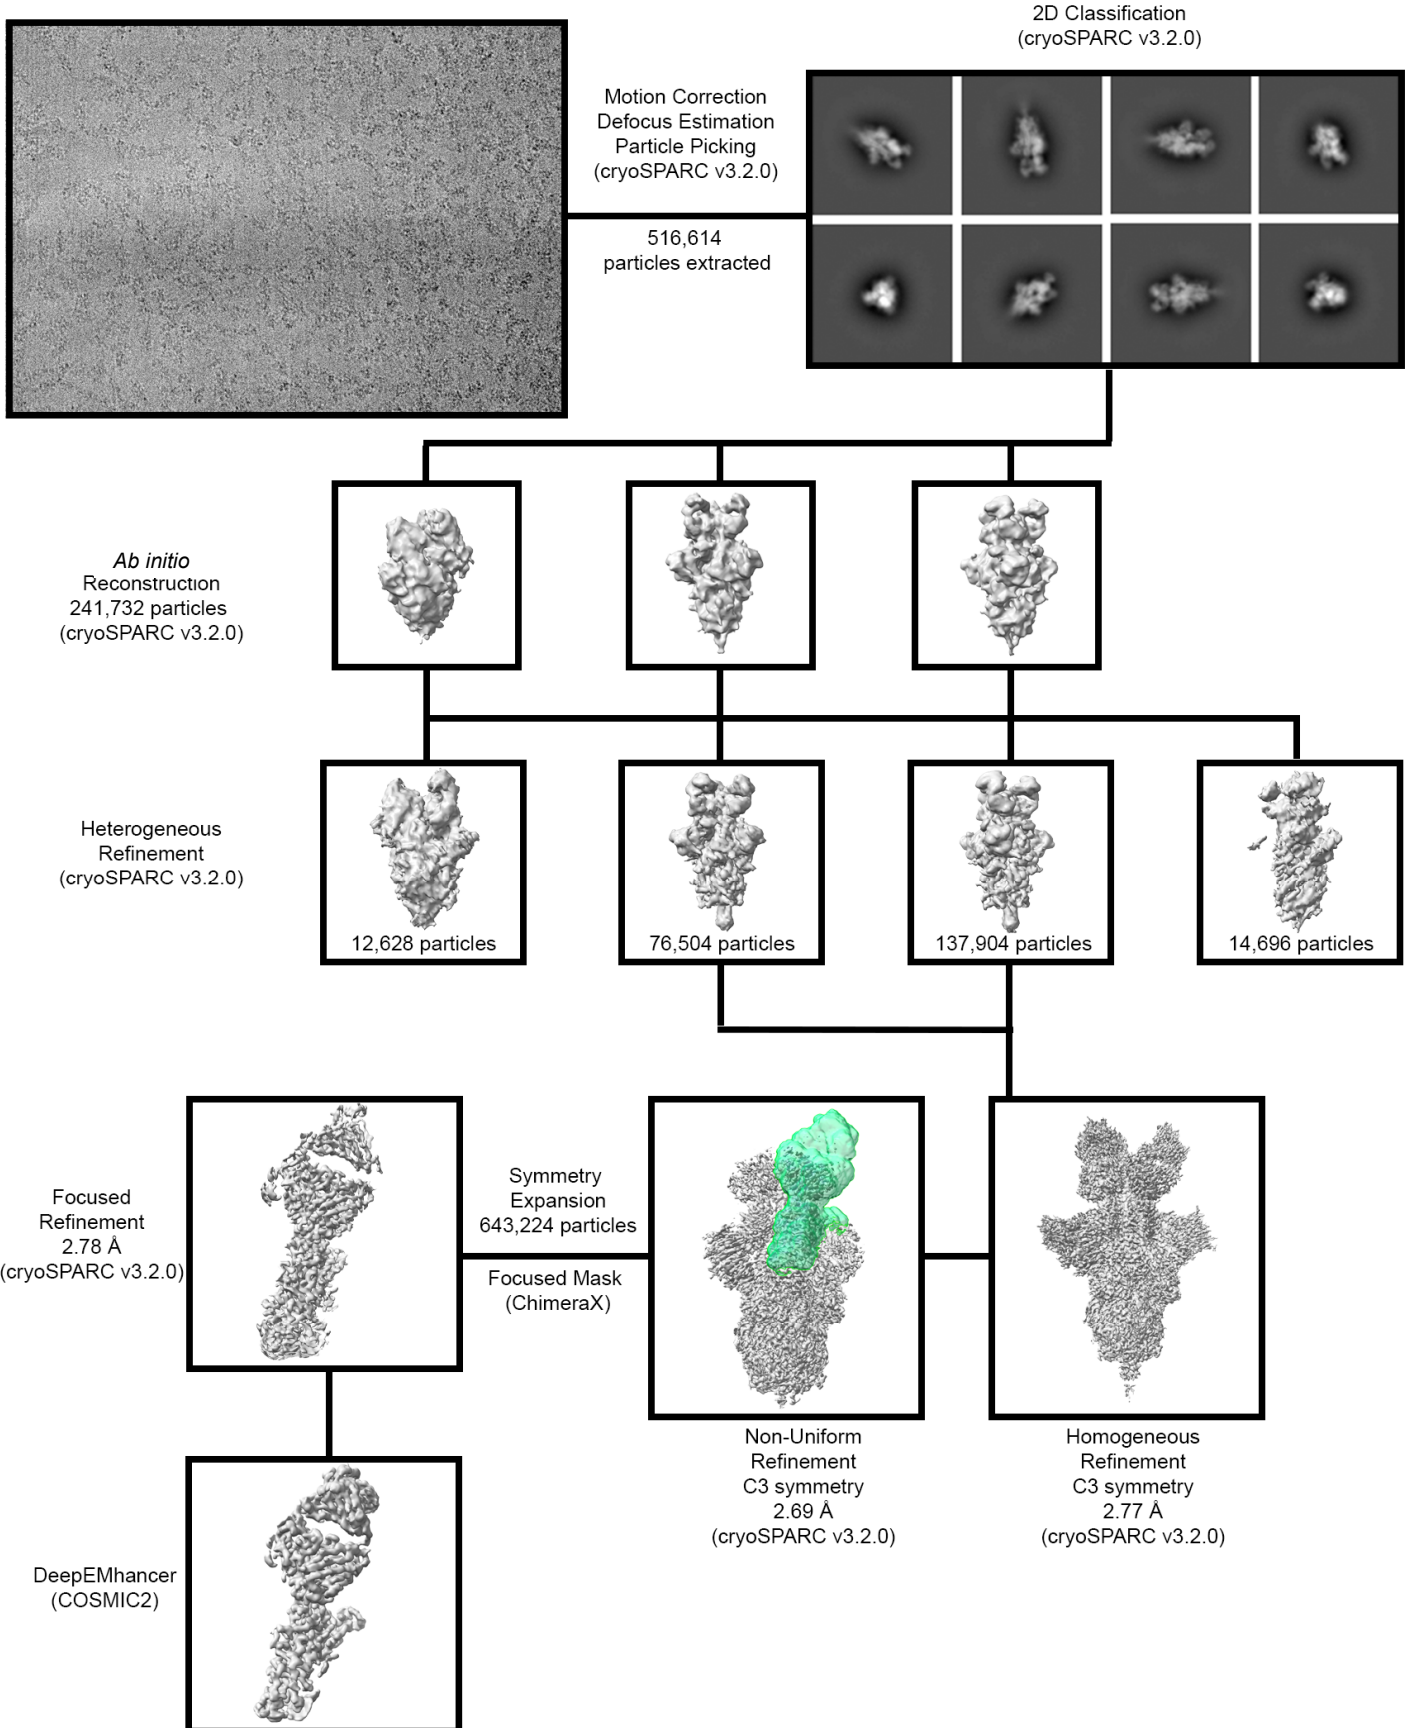

**Supplemental Figure 5: Cryo-EM data processing workflow, related to Figure 3.**

Flowchart outlining cryo-EM data processing of Fab 54042-4 Fab bound to SARS-CoV-2 S. Additional information can be found in the Methods section under “Cryogenic electron microscopy (cryo-EM).”

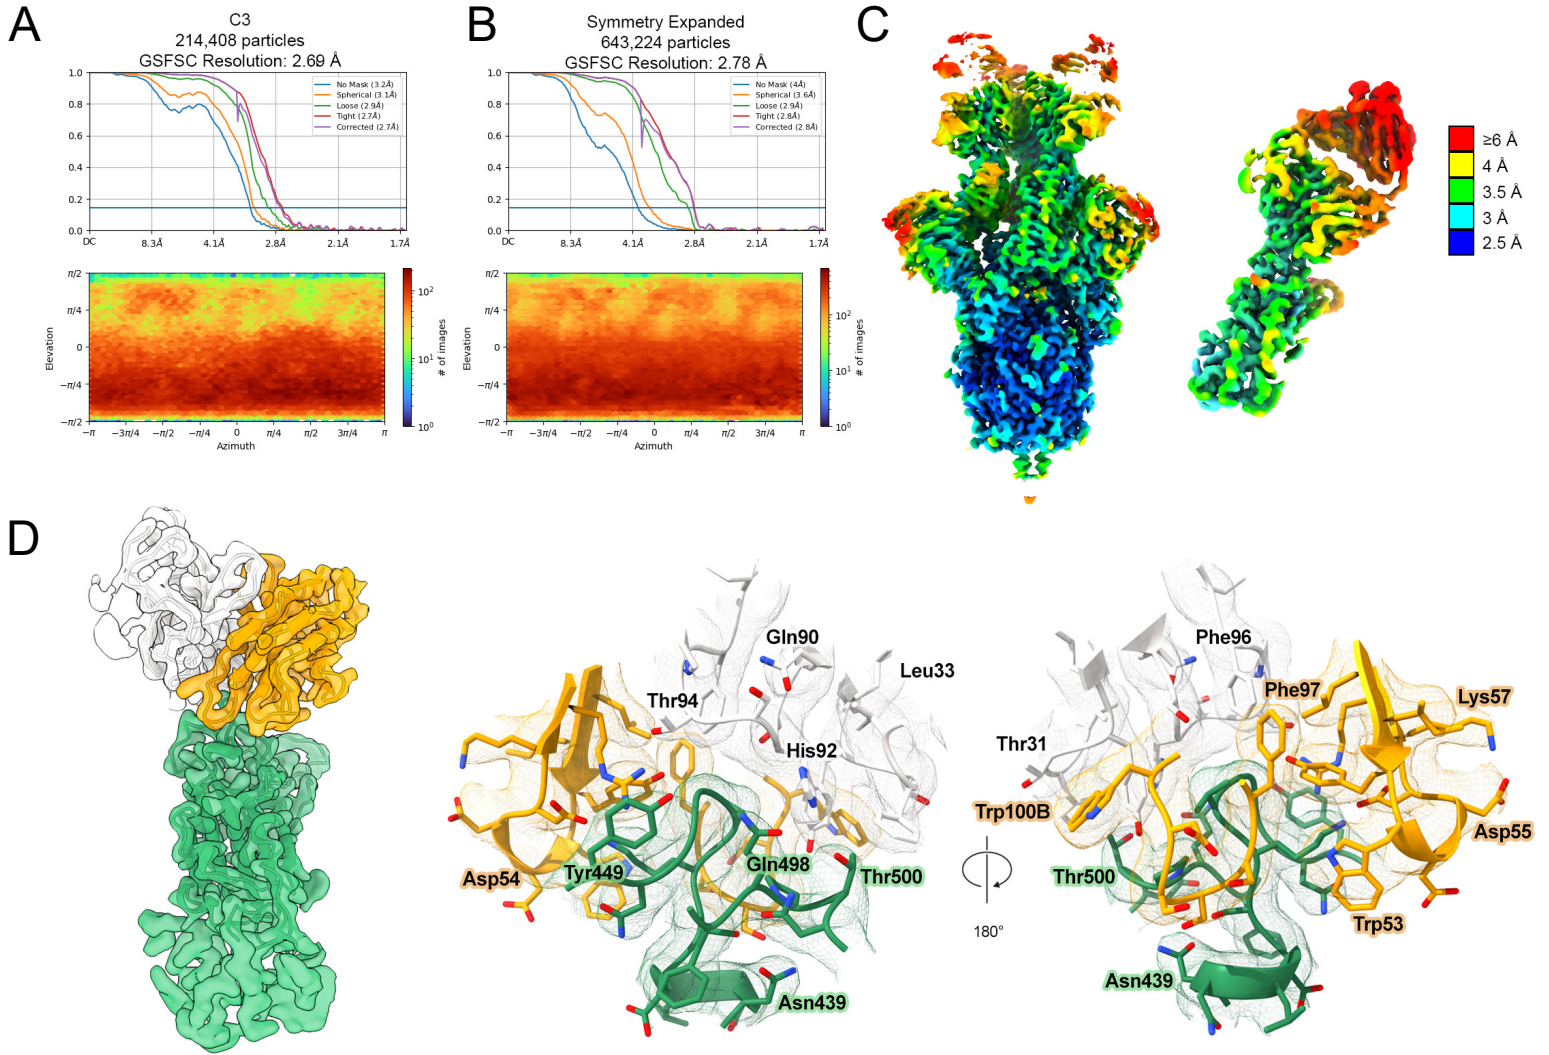

**Supplemental Figure 6: Cryo-EM structure validation, related to Figure 3.**

- (A) FSC curve and distribution plot for the C3 S-ECD/54042-4 structure, generated in cryoSPARC v3.2.0.
- (B) FSC curve and viewing distribution plot for focused refinement of the S-RBD bound to 54042-4 Fab.
- (C) Local resolution shown by color of the C3 S-ECD/54042-4 (left) and focused S-RBD/54042-4 (right) reconstructions.
- (D) Map resulting from focused refinement of the RBD (green) (left), 54042-4 heavy chain (orange), and 54042-4 light chain (white). Detailed views of the binding interface and corresponding map (center, right). Oxygen atoms are colored red, nitrogen blue, and sulfur yellow.

**EM data collection**

|                                            |                            |
|--------------------------------------------|----------------------------|
| Microscope                                 | FEI Titan Krios            |
| Voltage (kV)                               | 300                        |
| Detector                                   | Gatan K3                   |
| Magnification (nominal)                    | 29,000                     |
| Pixel size (Å/pix)                         | 0.81                       |
| Exposure rate (e <sup>-</sup> /pix/sec)    | 9.66                       |
| Frames per exposure                        | 100                        |
| Exposure (e <sup>-</sup> /Å <sup>2</sup> ) | 70                         |
| Defocus range (□m)                         | 1.5-2.5                    |
| Tilt angle (°)                             | 30                         |
| Micrographs collected                      | 3,762                      |
| Micrographs used                           | 1,610                      |
| Particles extracted (total)                | 516,664                    |
| Automation software                        | SerialEM                   |
| Sample                                     | SARS-CoV-2 S + 54042-4 Fab |

**3D reconstruction statistics**

|                                      | Overall | RBD-54042-4 subcomplex      |
|--------------------------------------|---------|-----------------------------|
| Particles                            | 214,408 | 643,224 (symmetry expanded) |
| Symmetry                             | C3      | C1                          |
| Map sharpening B-factor              | -81.8   | -94.6                       |
| Unmasked resolution at 0.5 FSC (Å)   | 3.69    | 3.56                        |
| Masked resolution at 0.5 FSC (Å)     | 3.06    | 3.25                        |
| Unmasked resolution at 0.143 FSC (Å) | 3.20    | 3.28                        |
| Masked resolution at 0.143 FSC (Å)   | 2.69    | 2.78                        |

**Model refinement and validation statistics**

|                    |                       |
|--------------------|-----------------------|
| Refinement package | Phenix                |
| Refinement tool    | Real-space refinement |

**Supplemental Table 1: PDB validation report, related to Figure 3.**

EM data collection, 3D reconstruction statistics, and model refinement & validation statistics for PDB upload.

## Supplemental Table 2

| <b>PDB-id</b> | <b>Pearson<br/>Correlation</b> | <b>PDB-id</b> | <b>Pearson<br/>Correlation</b> | <b>PDB-id</b> | <b>Pearson<br/>Correlation</b> |
|---------------|--------------------------------|---------------|--------------------------------|---------------|--------------------------------|
| 6XDG          | 0.8543                         | 7JMP          | -0.2818                        | 7KLG          | -0.3426                        |
| 7MMO          | 0.8483                         | 7BEK          | -0.2837                        | 6XDG          | -0.3436                        |
| 7LSS          | 0.8251                         | 7KFV          | -0.2853                        | 7BYR          | -0.3460                        |
| 7K8W          | 0.6007                         | 7JX3          | -0.2880                        | 7DEU          | -0.3490                        |
| 7BEN          | 0.5747                         | 7BEN          | -0.2892                        | 7D00          | -0.3496                        |
| 7L7E          | 0.5098                         | 7BZ5          | -0.2911                        | 7CZR          | -0.3504                        |
| 7K8V          | 0.3231                         | 6XKQ          | -0.2918                        | 7CWO          | -0.3516                        |
| 6XKP          | 0.1940                         | 7BEH          | -0.2946                        | 7BEP          | -0.3573                        |
| 7JX3          | 0.1510                         | 7CJF          | -0.2976                        | 7K9Z          | -0.3586                        |
| 7BWJ          | 0.0041                         | 7CHB          | -0.2985                        | 7BEL          | -0.3588                        |
| 7CHH          | -0.0111                        | 7CZQ          | -0.3023                        | 7K8M          | -0.3596                        |
| 7LS9          | -0.0539                        | 7KFY          | -0.3058                        | 6XC3          | -0.3604                        |
| 7CZT          | -0.0724                        | 7DD8          | -0.3063                        | 7EAM          | -0.3625                        |
| 7K8Z          | -0.1003                        | 7K45          | -0.3076                        | 7CDI          | -0.3676                        |
| 7CZX          | -0.1183                        | 7D03          | -0.3087                        | 6XE1          | -0.3701                        |
| 7LY2          | -0.1263                        | 7B3O          | -0.3126                        | 7D0D          | -0.3704                        |
| 7DK4          | -0.1278                        | 7BEL          | -0.3156                        | 7LM8          | -0.3743                        |
| 7K8Y          | -0.1519                        | 7DPM          | -0.3161                        | 7KZB          | -0.3758                        |
| 7K8U          | -0.1590                        | 7NDB          | -0.3172                        | 6XC7          | -0.3852                        |
| 7CDJ          | -0.2032                        | 6XC3          | -0.3198                        | 7EAN          | -0.3875                        |
| 7K90          | -0.2118                        | 7BEI          | -0.3200                        | 7KS9          | -0.3912                        |
| 7L56          | -0.2217                        | 7KMI          | -0.3251                        | 7JX3          | -0.3998                        |
| 7L5B          | -0.2261                        | 7JMO          | -0.3301                        | 7KMH          | -0.4010                        |
| 7LJR          | -0.2380                        | 7CZU          | -0.3303                        | 7LAA          | -0.4034                        |
| 7K8S          | -0.2471                        | 7CHF          | -0.3316                        | 7JVA          | -0.4056                        |
| 7CZP          | -0.2475                        | 7CZY          | -0.3345                        | 7NX6          | -0.4105                        |
| 7JV2          | -0.2565                        | 7LM9          | -0.3366                        | 7LD1          | -0.4112                        |
| 7ND7          | -0.2600                        | 7NEH          | -0.3370                        | 7K9Z          | -0.4178                        |
| 7C01          | -0.2652                        | 7KLH          | -0.3371                        | 6XCM          | -0.4192                        |
| 7KMG          | -0.2725                        | 7CZV          | -0.3371                        | 7D0C          | -0.4197                        |
| 7CM4          | -0.2796                        | 7KFX          | -0.3386                        | 7NX8          | -0.4204                        |
| 6XEY          | -0.2803                        | 7ND9          | -0.3393                        | 7CH5          | -0.4317                        |
| 7KFW          | -0.2814                        | 7CAI          | -0.3397                        | 7L58          | -0.5379                        |



**Supplemental Table 2: PDB files used for epitope comparisons, related to Figure 4.**

PDB files collated to compare the angle of approach of 54042-4 to published SARS-CoV-2 RBD directed antibodies
